# Supplementary material for: Pyrazine-functionalized calix[4]arenes: synthesis by palladium-catalyzed cross-coupling with phosphorus pronucleophiles and metal ion extraction properties
Source: Royal Society of Chemistry journal article supplement (doi:10.1039/c2nj40791d), 2012-10-22

## Supporting Information

### **Pyrazine-functionalized calix[4]arenes: synthesis by palladium-catalyzed cross-coupling with phosphorus pronucleophiles and metal ion extraction properties**

**Nicolai I. Nikishkin,<sup>[a]</sup> Jurriaan Huskens,<sup>[a]</sup> Seraj A. Ansari,<sup>[b]</sup> Prasanta K. Mohapatra<sup>[b]</sup> and Willem Verboom\*<sup>[a]</sup>**

<sup>a</sup>*Laboratory of Molecular Nanofabrication, MESA+ Institute for Nanotechnology, University of Twente, P.O. Box 217, 7500 AE Enschede, The Netherlands*

*e-mail: w.verboom@utwente.nl*

<sup>b</sup>*Radiochemistry Division, Bhabha Atomic Research Centre, Trombay, Mumbai-400085, INDIA*

Solubility data of several pyrazine-based ligands, Am(III) extraction by ligand **14** at varying concentrations of aqueous phase acidity plot and <sup>1</sup>H and <sup>13</sup>C NMR spectra for compounds **8**, **9**, **10**, **11**, **12**, **14**, **15**, **17**, and **20**.

**Table S-1** Solubility data of several pyrazine-based ligands.

| Diluent                                       | Ligand    | Remarks                                    |
|-----------------------------------------------|-----------|--------------------------------------------|
| Nitrobenzene                                  | <b>8</b>  | Freely soluble                             |
| Nitrobenzene                                  | <b>14</b> | Freely soluble                             |
| Nitrobenzene                                  | <b>15</b> | Freely soluble                             |
| Nitrobenzene                                  | <b>17</b> | Freely soluble                             |
| Chloroform                                    | <b>17</b> | Freely soluble                             |
| PTMS                                          | <b>17</b> | Sparingly soluble                          |
| 1-Decanol                                     | <b>17</b> | Sparingly soluble                          |
| 30% <i>i</i> -decanol /<br><i>n</i> -dodecane | <b>17</b> | Soluble after 30 min of<br>ultrasonication |
| <i>n</i> -dodecane                            | <b>17</b> | Insoluble                                  |
| NPOE                                          | <b>17</b> | Soluble                                    |

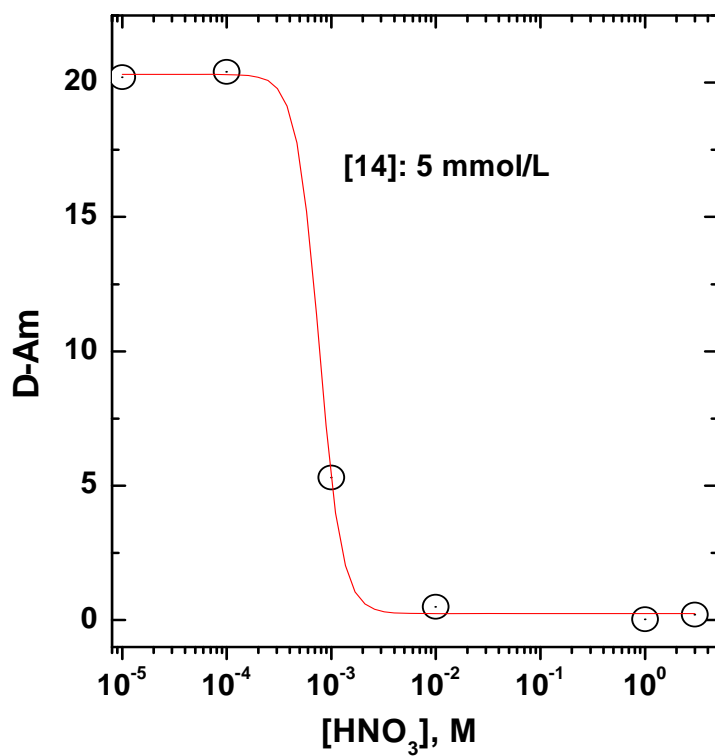

**Fig. S-1:** Extraction of Am(III) by ligand **14** at varying concentrations of aqueous phase acidity.

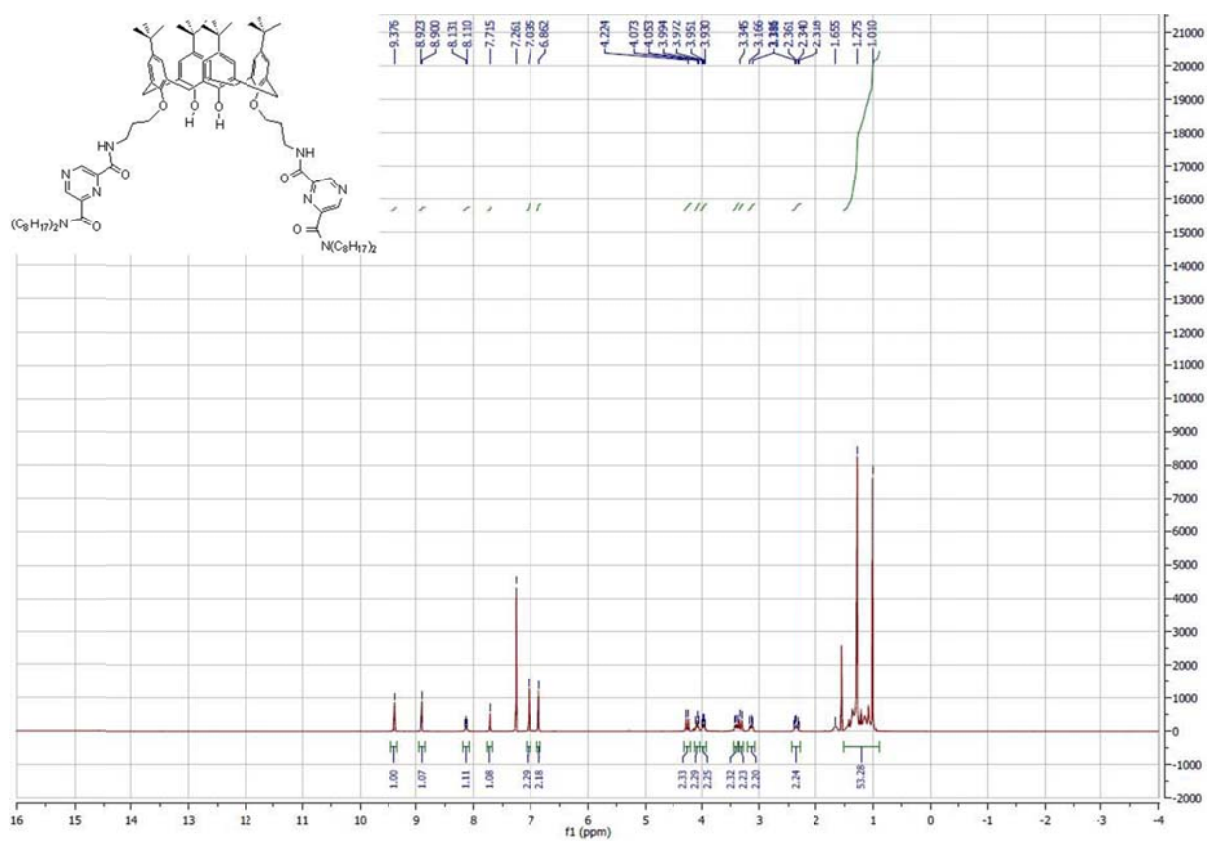

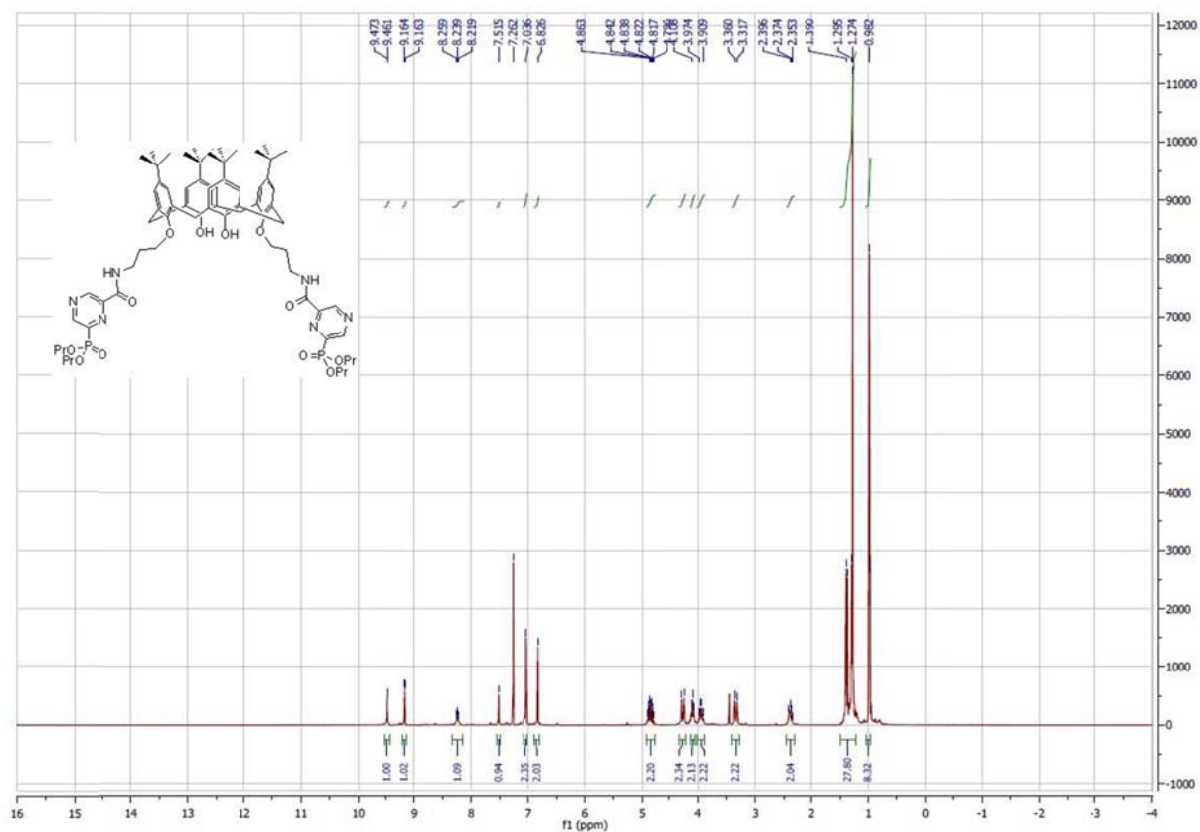

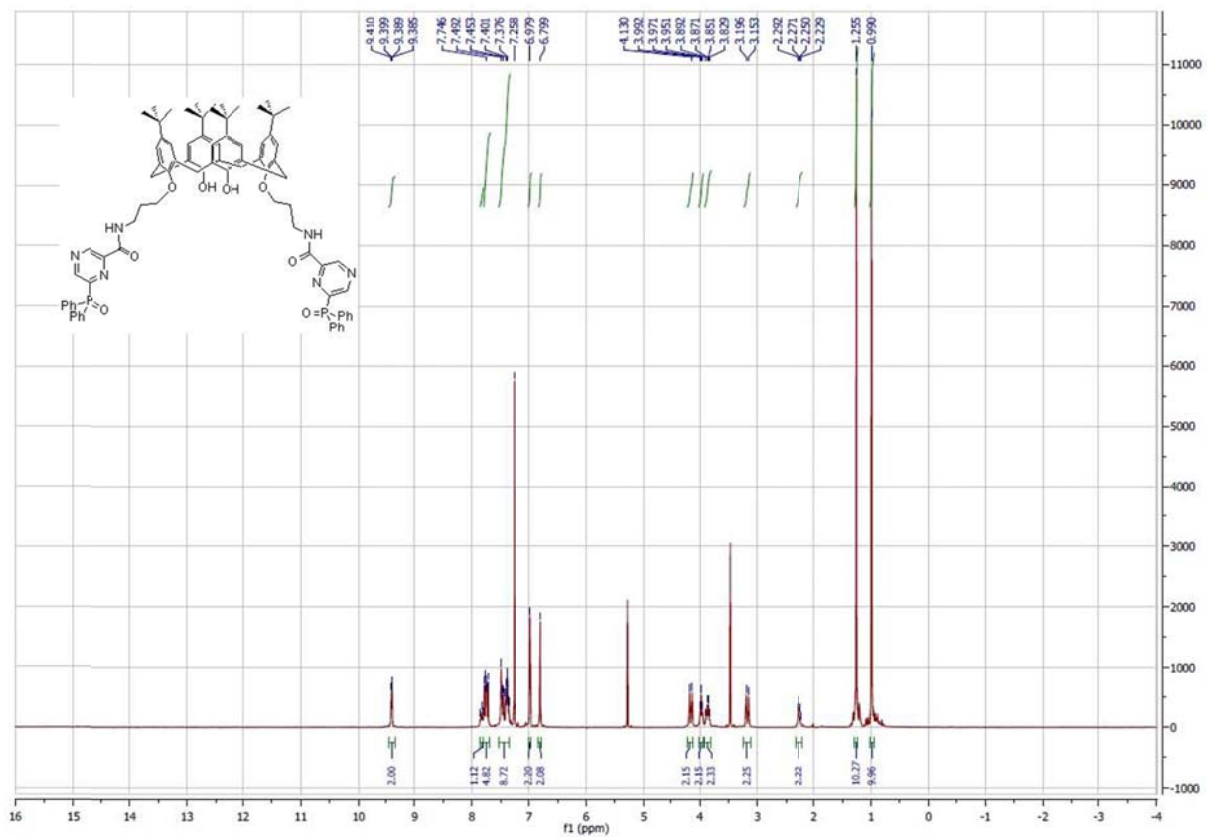

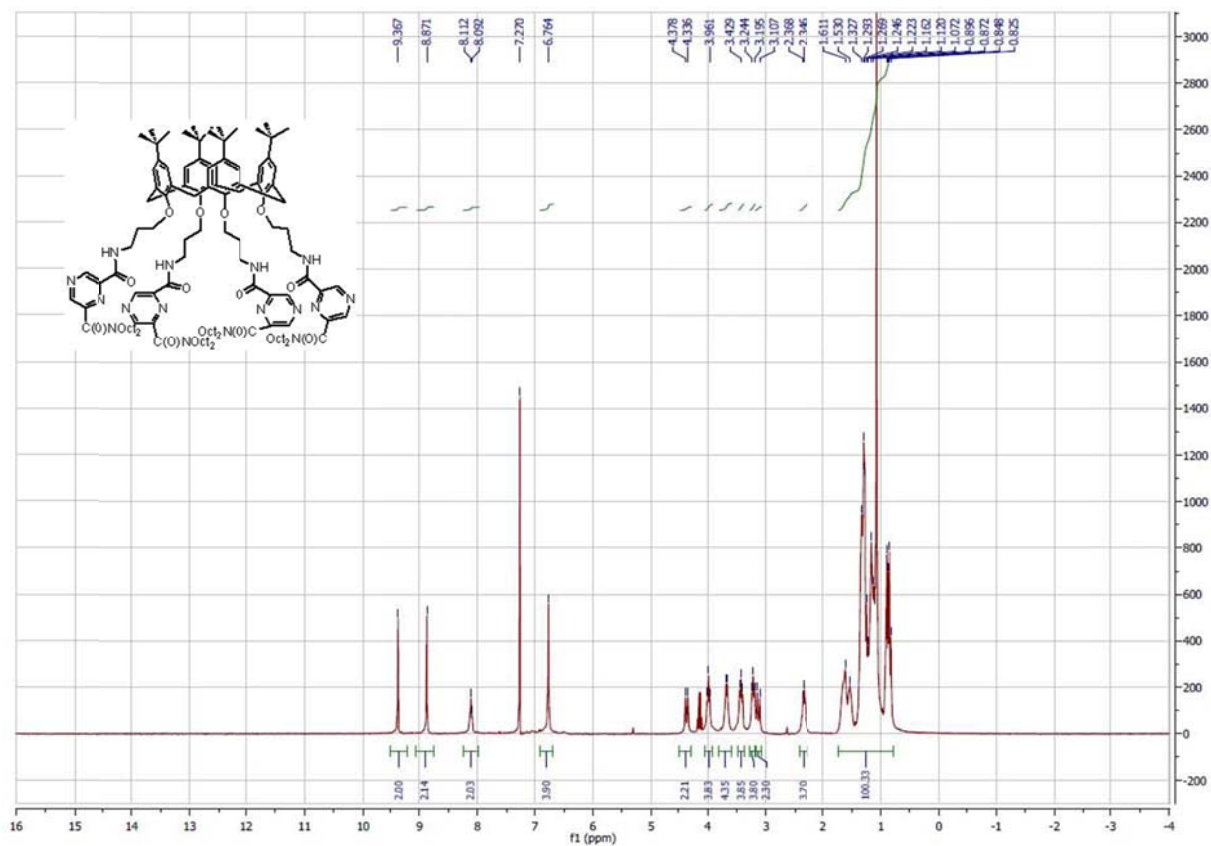

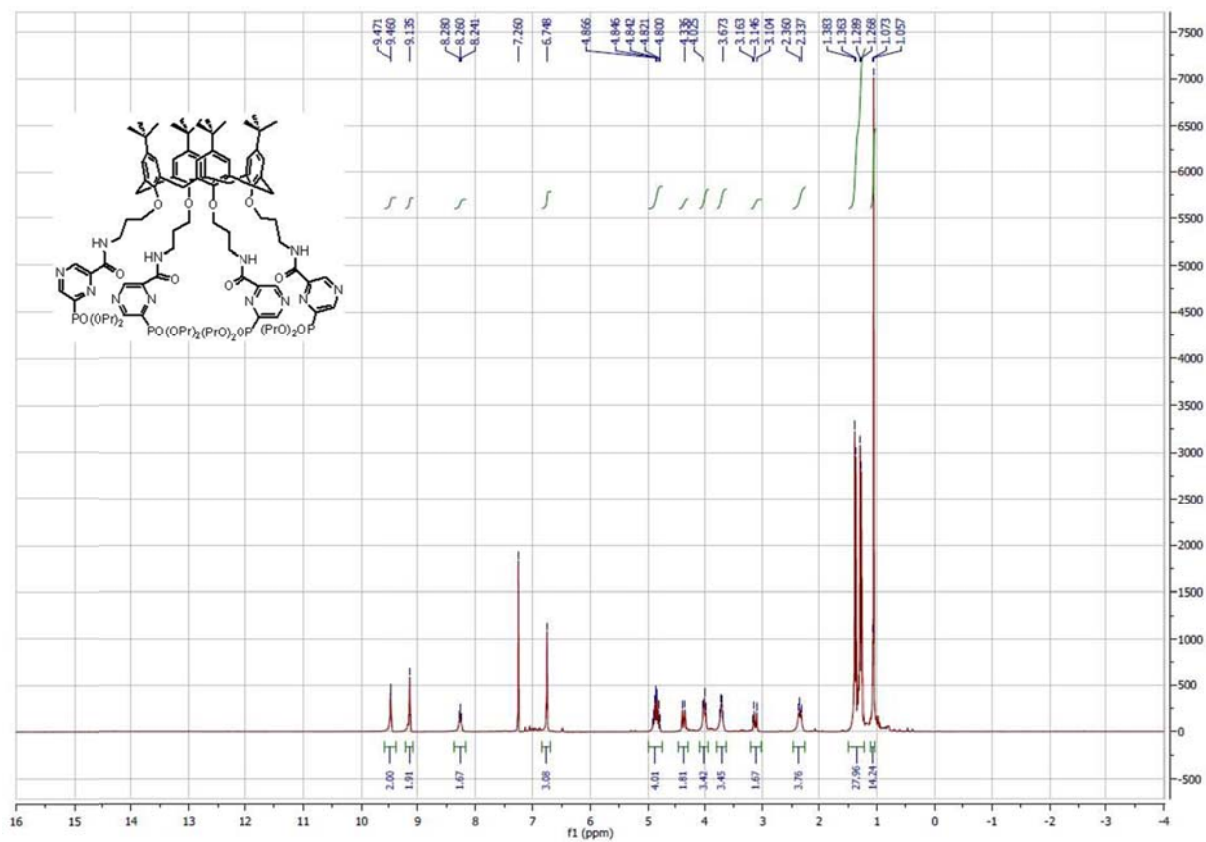





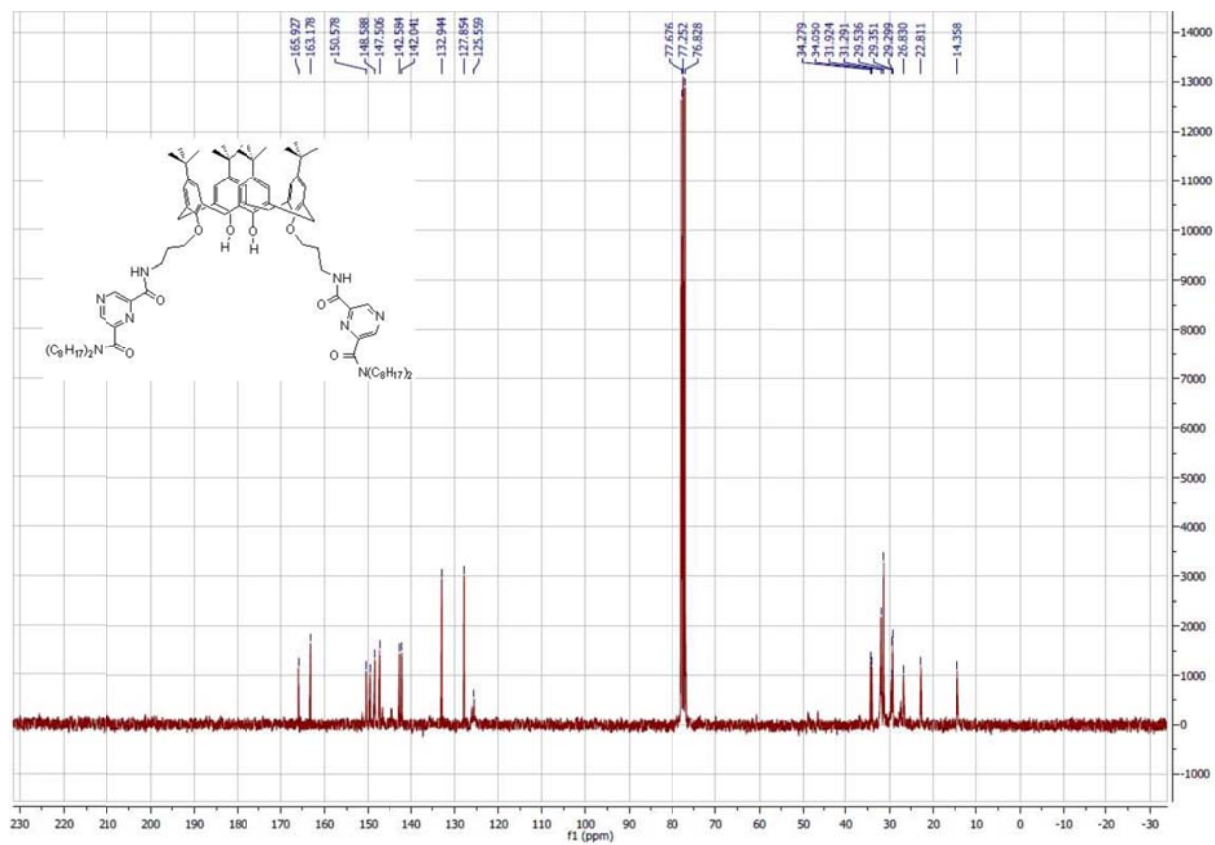

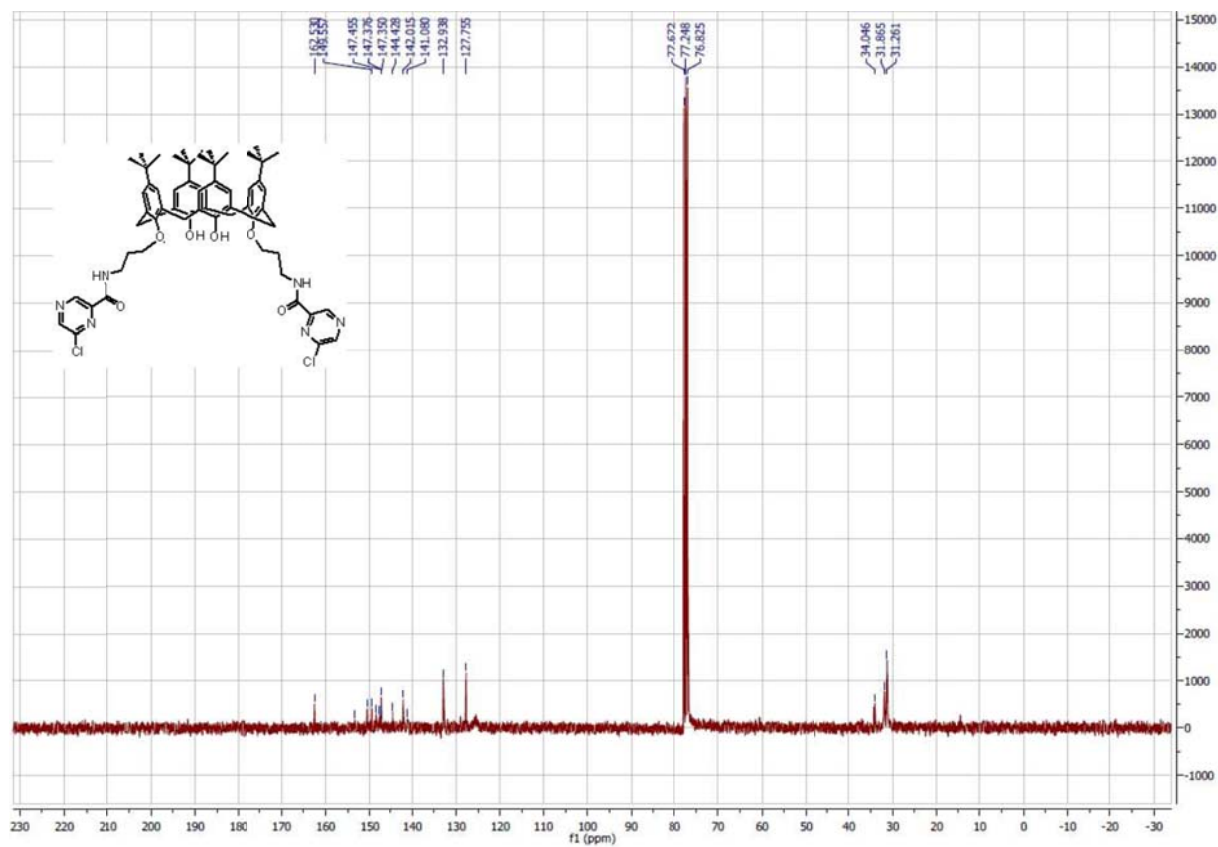

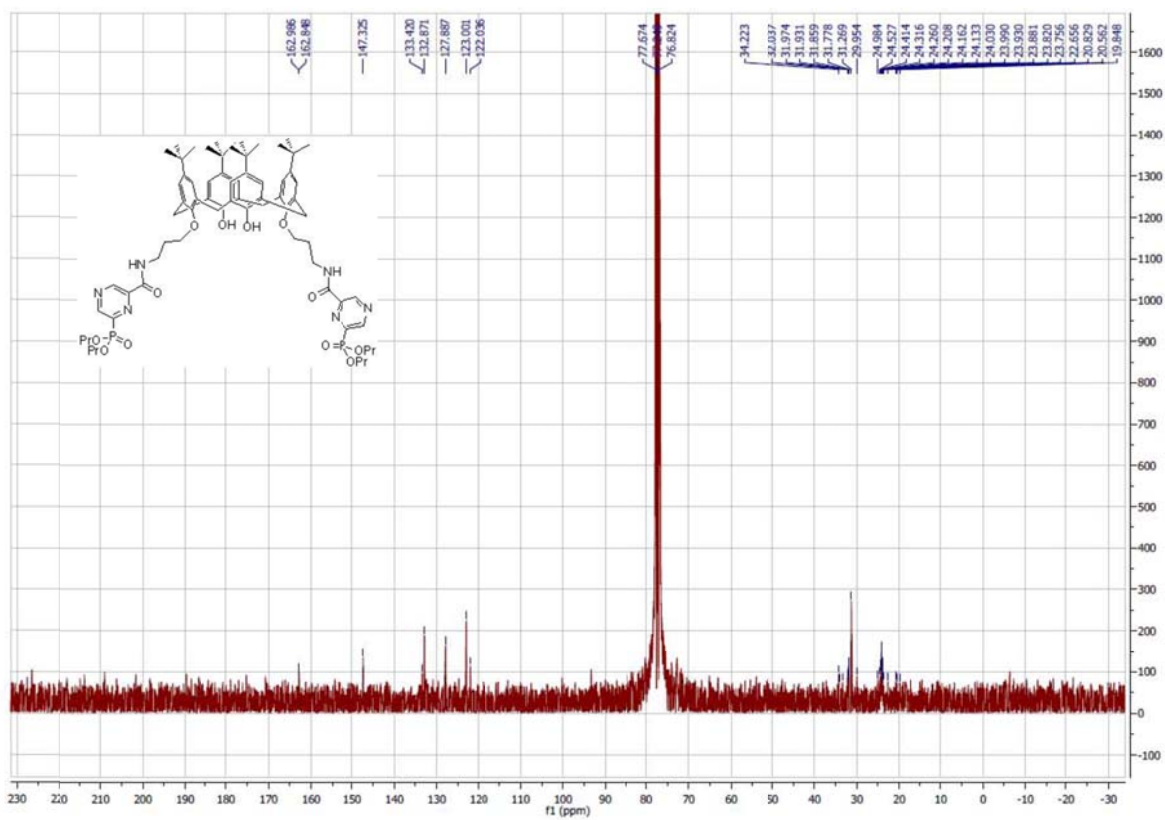

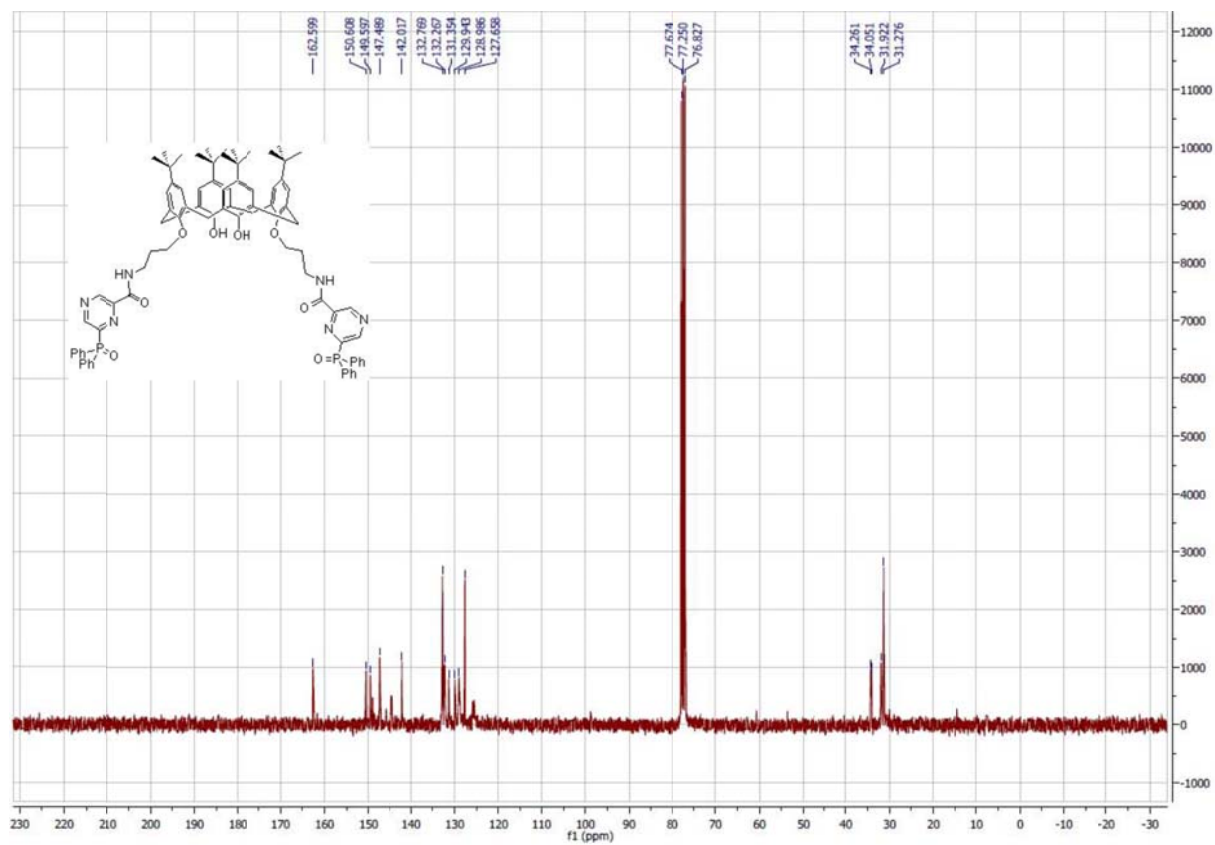

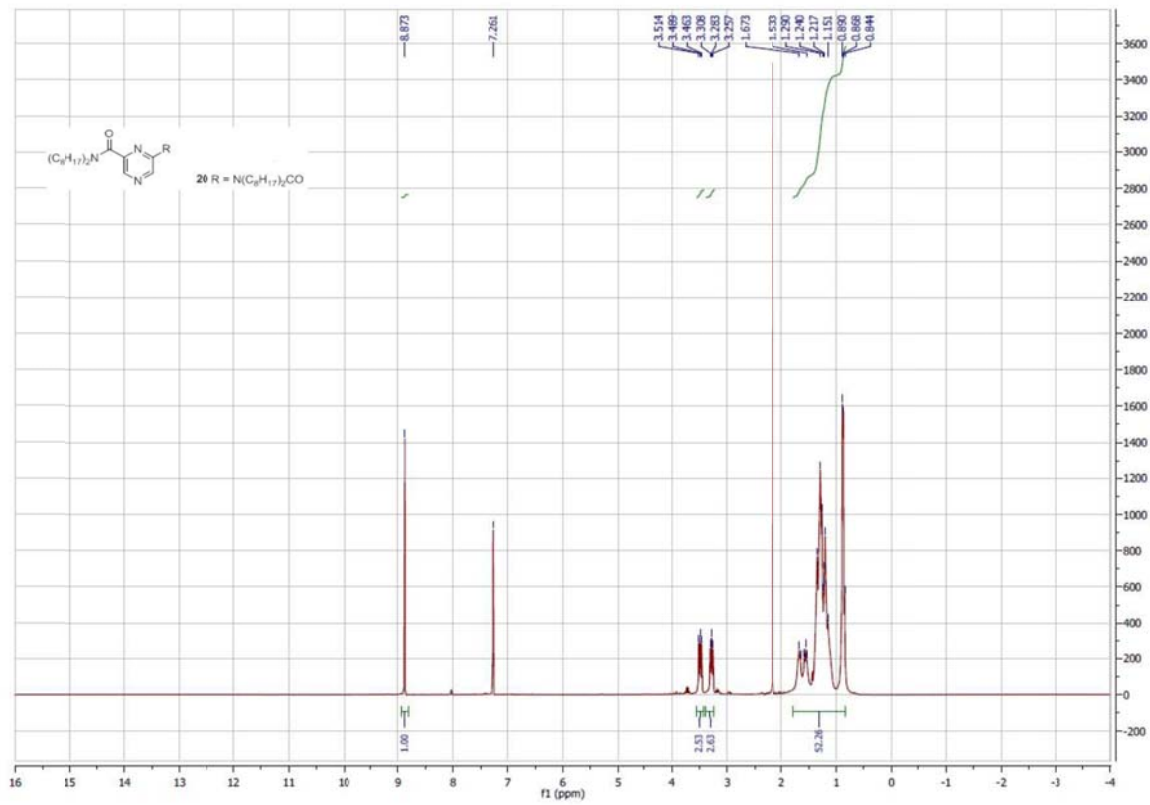

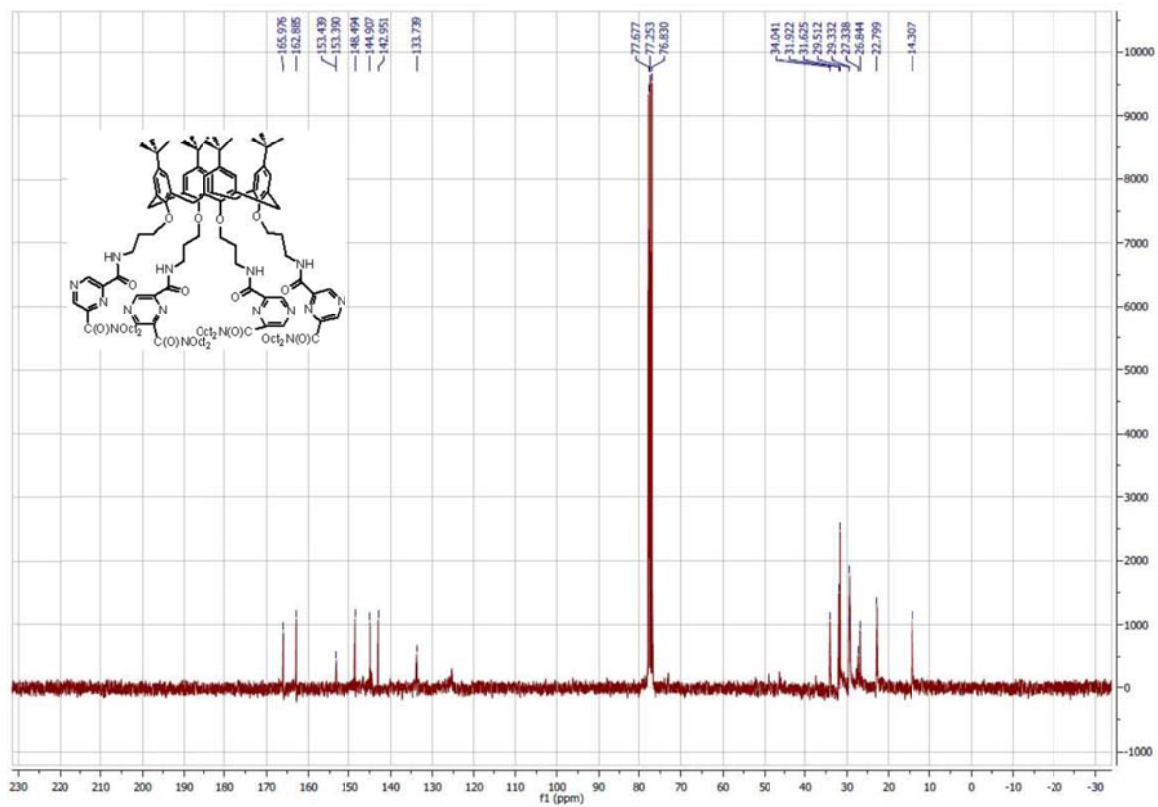





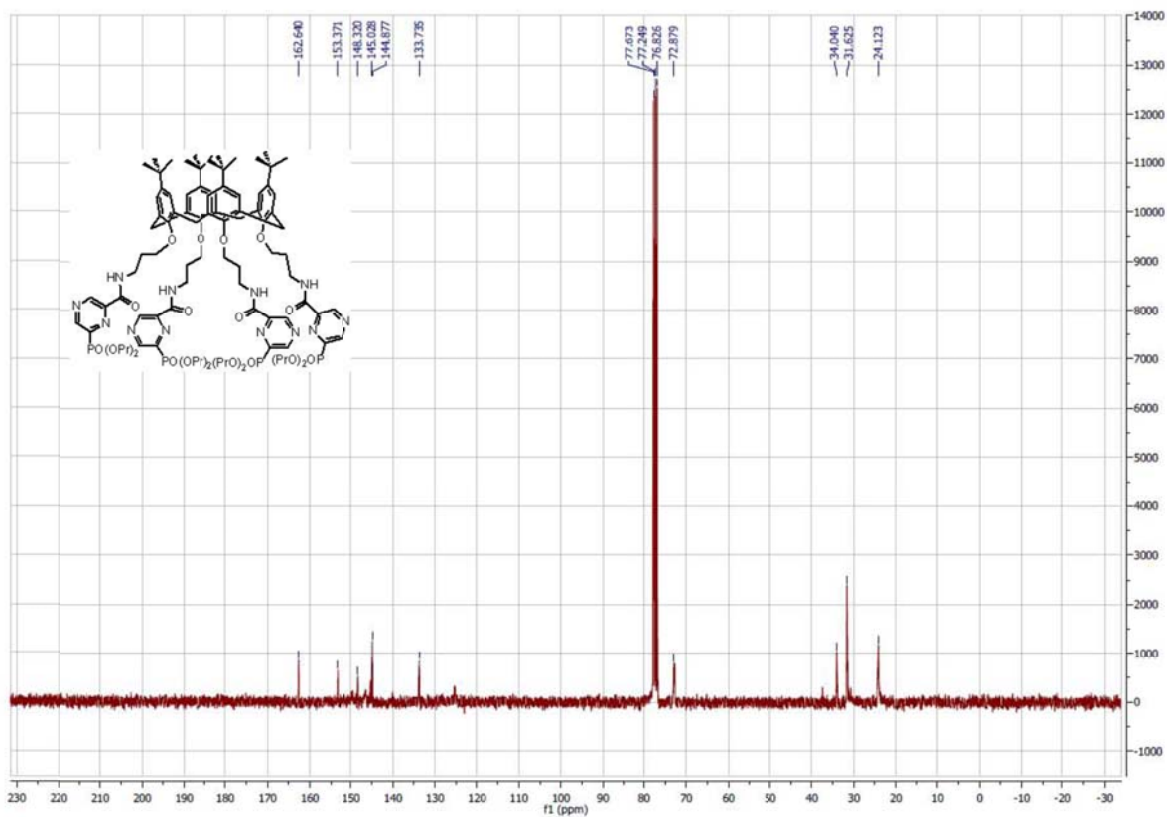

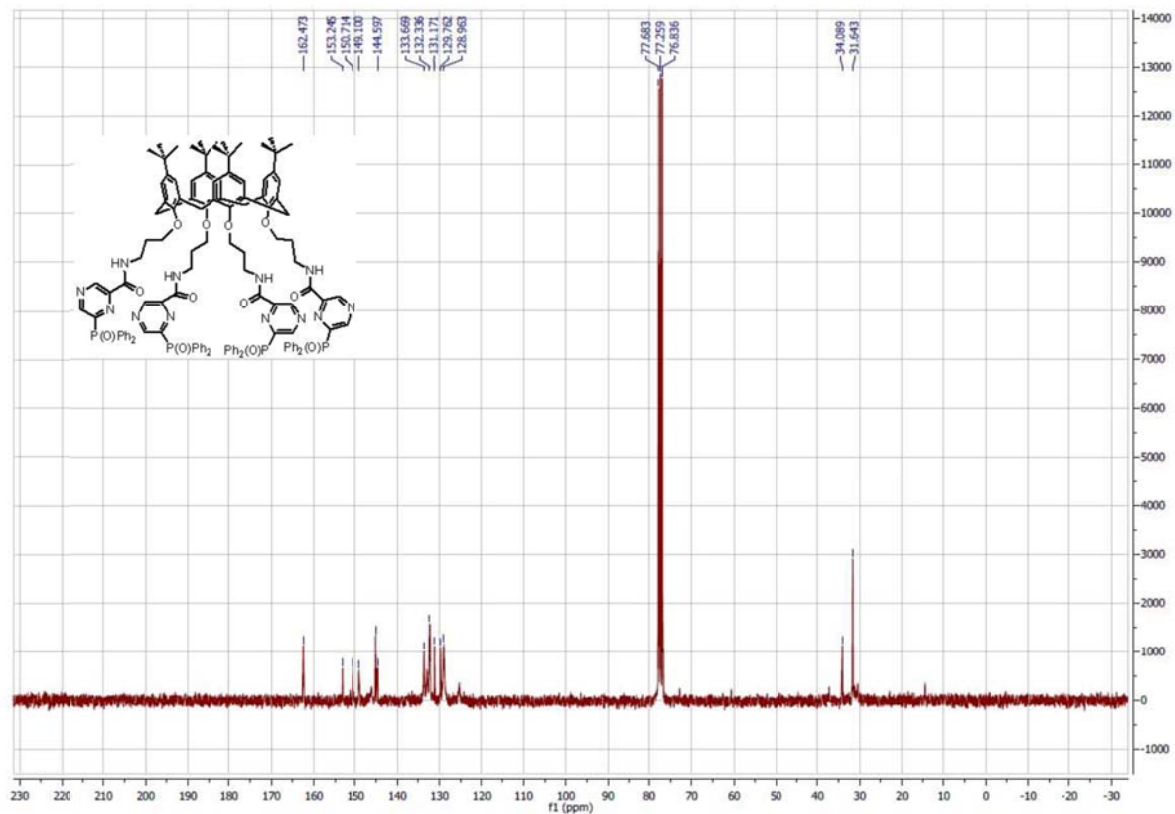

Supplement: c2nj40791d.pdf [file c2nj40791d.pdf]
